# Supplementary material for: Run or die in the evolution of new microRNAs - Testing the Red Queen hypothesis on de novo new genes
Source: bioRxiv or medRxiv preprint supplement (doi:10.1101/345769), 2020-06-15
Supplement: Supplementary file [file 345769-1.pdf]

## Supplementary Text:

Van Valen (1973) first proposed the Red Queen hypothesis (RQH) over 40 years ago. In his original famous paper <sup>1</sup>, he stated: "The Red Queen does not need changes in the physical environment, although she can accommodate them. Biotic forces provide the basis for a self-driving (at this level) perpetual motion of the effective environment and so of the evolution of the species affected by it." This hypothesis revised the idea that organisms are only adapted to abiotic environment, and emphasized biotic factors are also important in driving evolutionary changes. After that, RQH has been applied to explain many biotic interactions, including co-evolution of parasite and host, prey and predator, sexual antagonism and even the evolution of sex <sup>2-7</sup>.

Although RQH is often used to explain arm race between or within species, its application could be much broader because the essence of this metaphor is continual adaptation. Just like Red Queen advised Alice to keep running for staying in the same place, species also has to run to keep pace with a moving world. Previous adaptations do not assure the safety of a species when it is facing new challenges from environment (both biotic and abiotic). When in the adaptive landscape, newly emerged species/traits under selective pressure might evolve continually or go extinction. The same logic can also be applied to genic level. Many new genes emerged adaptively, because they have fitness advantages and outcompete "the absence of this gene" at the beginning. However, gene content remains largely constant during long period of evolution. This contradiction implies many of these new materials face elimination soon after their emergence. More importantly, it also implies the adaptation is often transient rather than permanent. In this study, we test the Red Queen hypothesis by studying the evolution of *de novo* genes, which are indeed new when compared with those duplicated genes. If the adaptive landscape is as shifty as posited by the Red Queen hypothesis, we expect that these *de novo* genes will keep evolving and have different evolutionary fates in

different species. In addition, we also discuss what might be the driven force for their continual evolution.

### References:

1. Van Valen, L. *A New Evolutionary Law*, 1–30 (1973).
2. Morran, L.T., Schmidt, O.G., Gelarden, I.A., Parrish, R.C., 2nd & Lively, C.M. Running with the Red Queen: host-parasite coevolution selects for biparental sex. *Science* **333**, 216-8 (2011).
3. Brockhurst, M.A. Evolution. Sex, death, and the Red Queen. *Science* **333**, 166-7 (2011).
4. King, K.C., Delph, L.F., Jokela, J. & Lively, C.M. The geographic mosaic of sex and the Red Queen. *Curr Biol* **19**, 1438-41 (2009).
5. Ebert, D. Host-parasite coevolution: Insights from the Daphnia-parasite model system. *Curr Opin Microbiol* **11**, 290-301 (2008).
6. Brockhurst, M.A. *et al.* Running with the Red Queen: the role of biotic conflicts in evolution. *Proc Biol Sci* **281**(2014).
7. Liow, L.H., Van Valen, L. & Stenseth, N.C. Red Queen: from populations to taxa and communities. *Trends Ecol Evol* **26**, 349-58 (2011).

## Supplementary Figure Legends:

### Figure S1 miRNA expressions in *Drosophila melanogaster* miR-972 and miR-982 cluster

All mature miRNAs from the two clusters are plotted. Major miRs from the six *de novo* miRNAs are labeled. RPM, reads per million.

### Figure S2 miRNA mutant sequence, hairpin structures and mutant fly constructions in *D. melanogaster* and *D. simulans*

- (A) *dme-mir-982-1/-2* mutant sequence. *dme-miR-983-5p* and *dme-miR-983-3p* are shaded in yellow and gray, respectively.
- (B) Hairpin structure of *dme-mir-984* KO sequence is less stable than that of the wild type sequence. MFE, minimum free energy.
- (C) Hairpin structure of *dsi-mir-983a* KO sequences are less stable than that of the wild type sequence. MFE, minimum free energy.
- (D) Cross scheme for miR-983/miR-984 mutant flies generation in *D. melanogaster*. Flies in red box are used for mutation detection or sanger sequencing (methods labeled on the right) after crossing with corresponding females. After embryo injection, each emerged fly of F<sub>0</sub> was used for mutation detection following SURVEYOR® Mutation Detection Kit manufactory protocol. If mutation was detected in F<sub>0</sub>, 20 of its F<sub>1</sub> virgin females were chosen, and each of them was crossed with FM7c balancer male. F<sub>2</sub> males were used for sanger sequencing to detect and confirm the mutant sequences. Fly containing mutation was crossed with its sibling female, making the mutation locus homozygous. Flies without mutation were served as control for downstream assays.
- (E) Same as above except that F<sub>0</sub> emerged flies are females.
- (F) Cross scheme for miR-983 mutant flies generation in *D. simulans*. Procedures are similar with steps shown in Fig. S2D. Note that F<sub>3</sub> flies were used for extra round of sanger sequencing, which ensures that homozygous mutant flies were chosen.
- (G) Same as above except that F<sub>0</sub> emerged flies are females.

### Figure S3 miRNA mutant phenotypes

- (A) – (B) Phase contrast for testes of *dme-mir-984* KO fly. All the sequential cell types are present and normal.
- (C) – (D) DAPI staining for testes of *dme-mir-984* mutant fly. \* indicates the apical end of testis, mitotic cells are normal. Arrows indicate the normal needle shaped spermatid nuclei. T, testis; SV, seminal vesicle; AG, accessory gland.
- (E) *dme-miR-983-5p* is significantly down-regulated after AMO injection. Student's t test,  $P < 0.01$ .
- (F) – (G) Cross scheme for introducing wild type fly autosomes into miR-983 mutant or control flies. Oregon-R is used as typical wild type fly. + indicates the autosomes in the original background, while \* indicates autosomes from Oregon-R.

**Figure S4 miR-983 regulation in *D. melanogaster* and *D. simulans***

- (A) miR-983-5p regulation strength. *dme* non-targets: non-targets in *D. melanogaster*, *dme* targets: *dme-miR-983-5p* targets in *D. melanogaster*; *dsi* non-targets: non-targets in *D. simulans*, *dsi* targets: *dsi-miR-983a-5p* targets in *D. simulans*. The small inset shows the whole distribution. Red dashed lines indicate the median expression fold changes of non-targets in the two species, respectively.
- (B) Empirical cumulative distribution of  $\log_2(\text{gene expression fold change})$  in *D. melanogaster*. Red and black lines represent PITA predicted *dme-miR-983-5p* targets and non-targets, respectively. Kolmogorov-Smirnov test,  $P = 0.2754$ .
- (C) Empirical cumulative distribution of  $\log_2(\text{gene expression fold change})$  in *D. simulans*. Red and black lines represent PITA predicted *dsi-miR-983a-5p* targets and non-targets, respectively. Kolmogorov-Smirnov test,  $P < 0.001$ .
- (D) Mis-regulated genes induced by miR-983 KO in *D. melanogaster* and *D. simulans* share small overlap.
- (E) Genes expressed in *D. melanogaster* and *D. simulans* testes share large overlap (~90%).
- (F) Gene expressions in *D. melanogaster* and *D. simulans* testes correlate well. Pearson's product-moment correlation,  $r = 0.91$ .

Figure S1

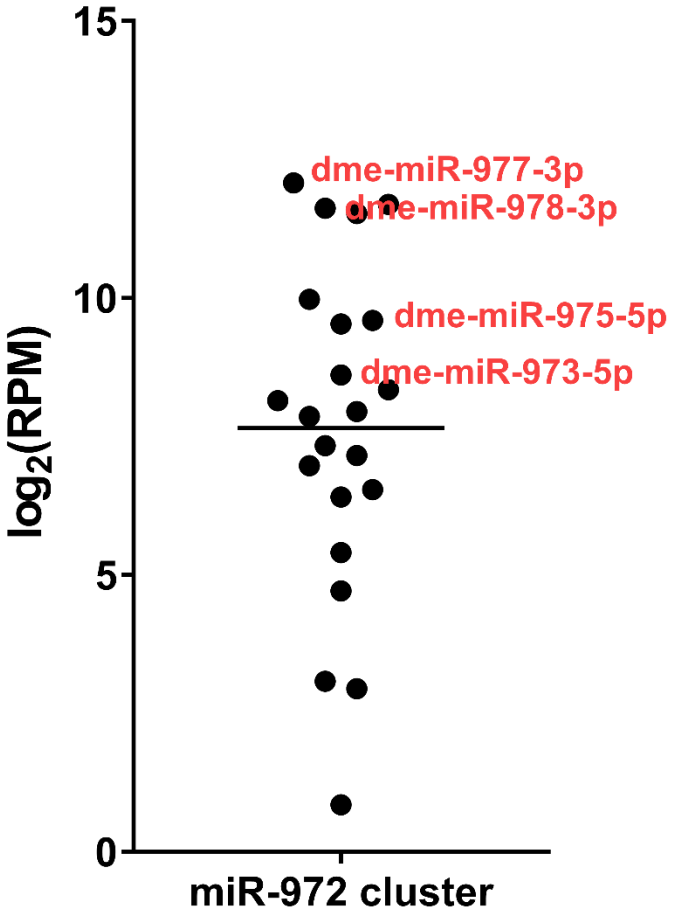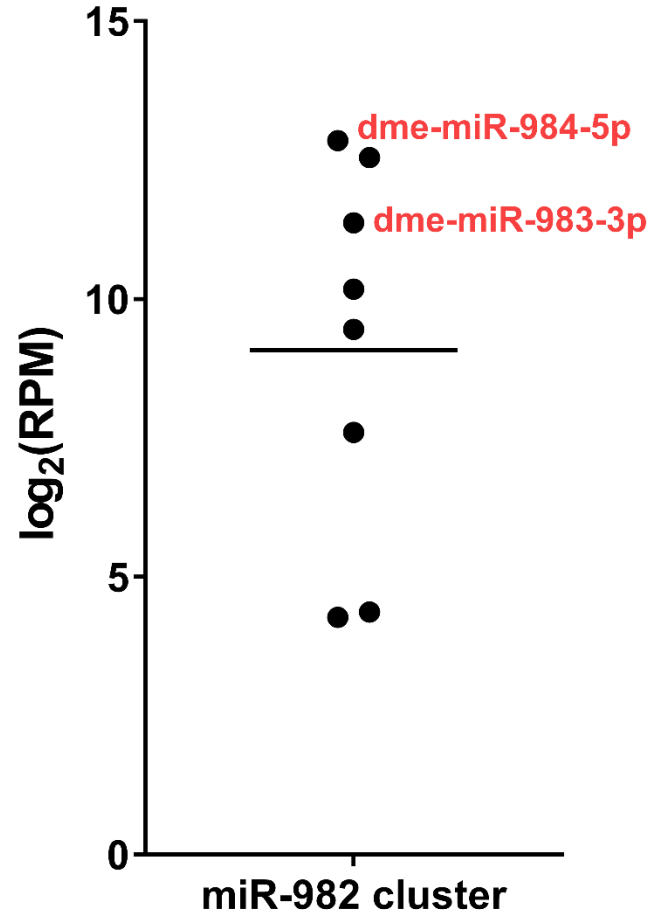

Figure S2

**A**

***dme-mir-983-1* and *dme-mir-983-2*:**

|            |                                                                                    |
|------------|------------------------------------------------------------------------------------|
|            | ..... ..... ..... ..... ..... ..... ..... ..... ..... ..... .....                  |
|            | 5 15 25 35 45 55                                                                   |
| Wild type  | TATTATATTG CAATAATTAA <b>ATAATACGTT TCGAACTAAT GA</b> TTTTTCAGT TCATTCATTA         |
| mir-983 KO | TATTATATTG CAATAATTAA ATAATACGTT TCGAACTAAT GATTTTCAGT TCATTCATTA                  |
|            | ..... ..... ..... ..... ..... ..... ..... ..... ..... ..... .....                  |
|            | 65 75 85 95 105 115                                                                |
| Wild type  | <b>GGTAGTTACG CATTATCTAG</b> TTGTTGTA AAA CATTCAACTC GATGGCGGAT GAGAAATTAC         |
| mir-983 KO | GGTAGTTA-- -----                                                                   |
|            | ..... ..... ..... ..... ..... ..... ..... ..... ..... ..... .....                  |
|            | 125 135 145 155 165 175                                                            |
| Wild type  | TTATGATGTA CCATTCTTGT AATAAACTGT GTGTGTAGAT TCATATTATA TGCATATGCT                  |
| mir-983 KO | -----                                                                              |
|            | ..... ..... ..... ..... ..... ..... ..... ..... ..... ..... .....                  |
|            | 185 195 205 215 225 235                                                            |
| Wild type  | ATTATATTGC AATAATTAAA <b>TAATACGTTT CGAACTAATG A</b> TTTTTCAGTT CATT <b>CATTAG</b> |
| mir-983 KO | -----                                                                              |
|            | ..... ..... ..... ..... ..... ..... ..... ..... ..... ..... .....                  |
|            | 245 255 265 275                                                                    |
| Wild type  | <b>GTAGTTACGC ATTATCTAGT</b> TGTTGTAAAC ATTCAACT                                   |
| mir-983 KO | -----TCTAGT TGTTGTAAAC ATTCAACT                                                    |

Figure S2

**B**

*dme-mir-984*

Wild type

KO

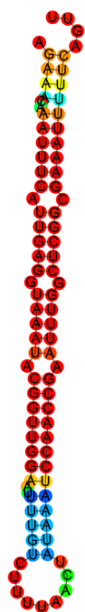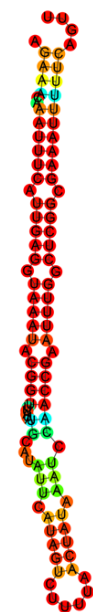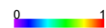

MFE (kcal/mol): -28.70

-21.70

**C**

*dsi-mir-983a*

Wild type

KO1

KO2

KO3

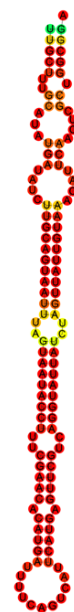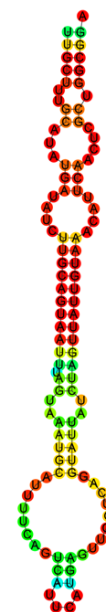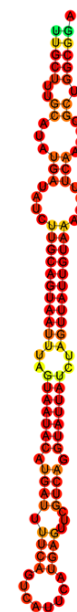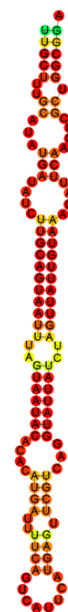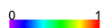

MFE (kcal/mol): -39.50

-19.40

-27.70

-26.30

Figure S2

*D. melanogaster*

Cross scheme for generating *dme-mir-984* or *dme-mir-983-1/-2* KO lines:

**D**

After injection, if the offspring is **Male**:

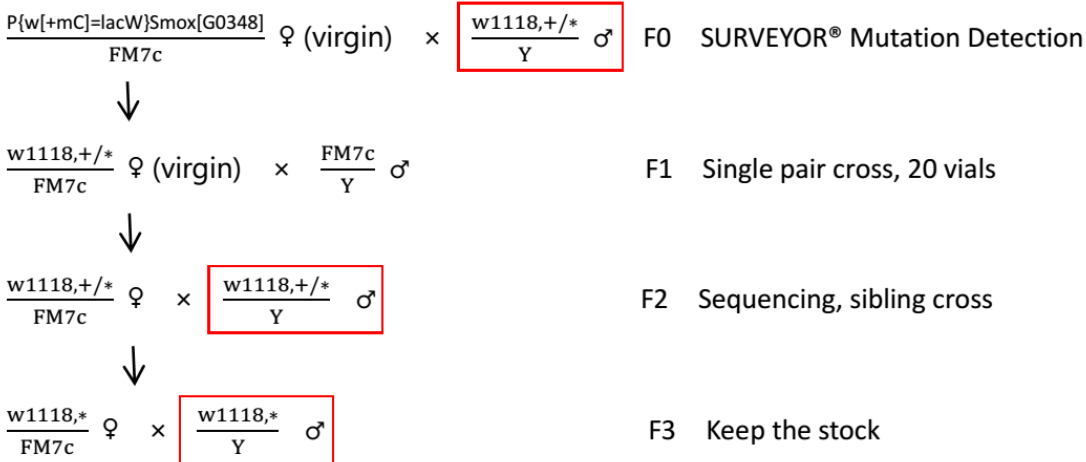

**E**

After injection, if the offspring is **Female**:

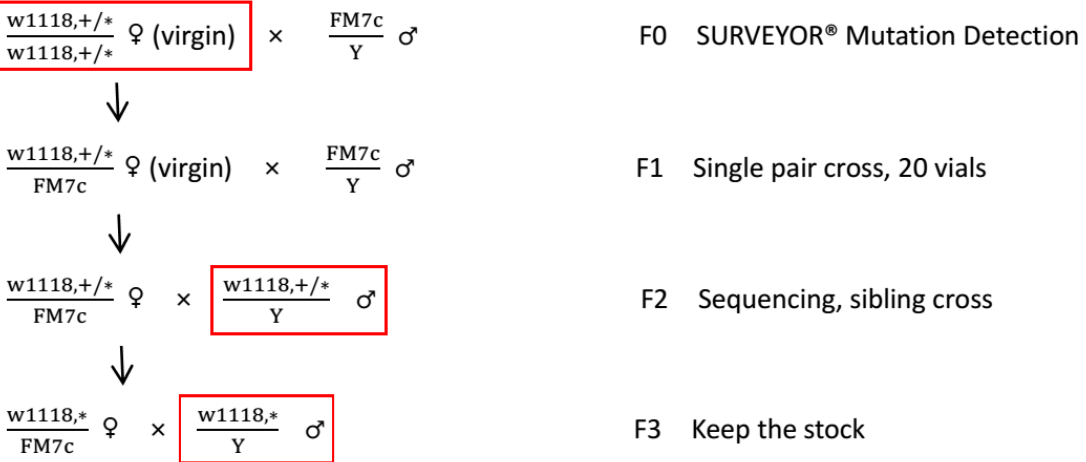



Figure S2

*D. simulans*

Cross scheme for generating *dsi-mir-983a* KO lines:

**F**

After injection, if the offspring is **Male**:

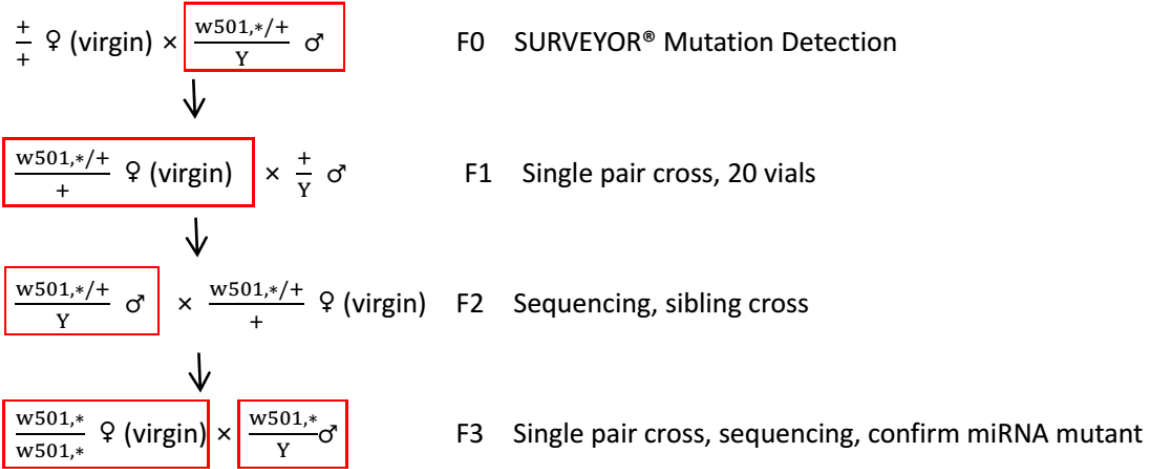

**G**

After injection, if the offspring is **Female**:

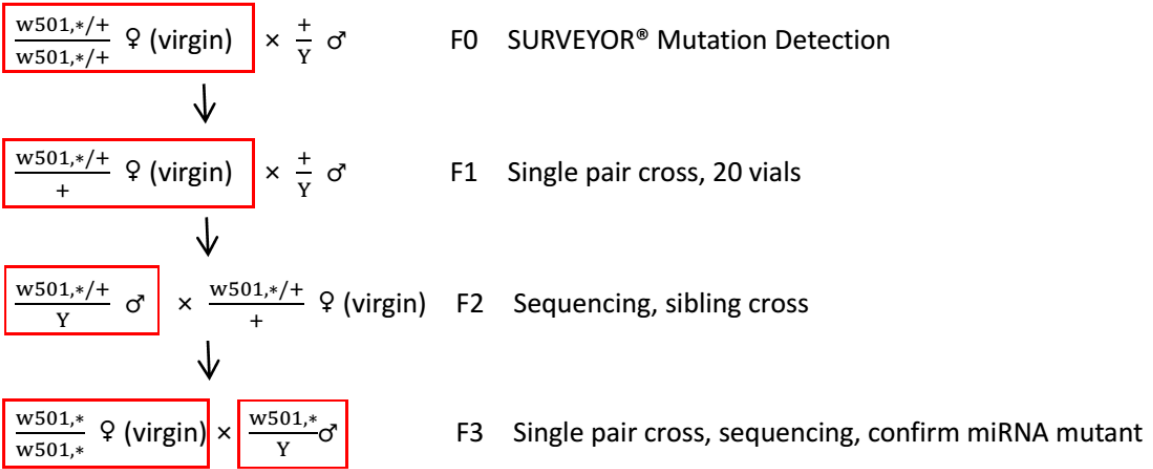

Figure S3

**A**

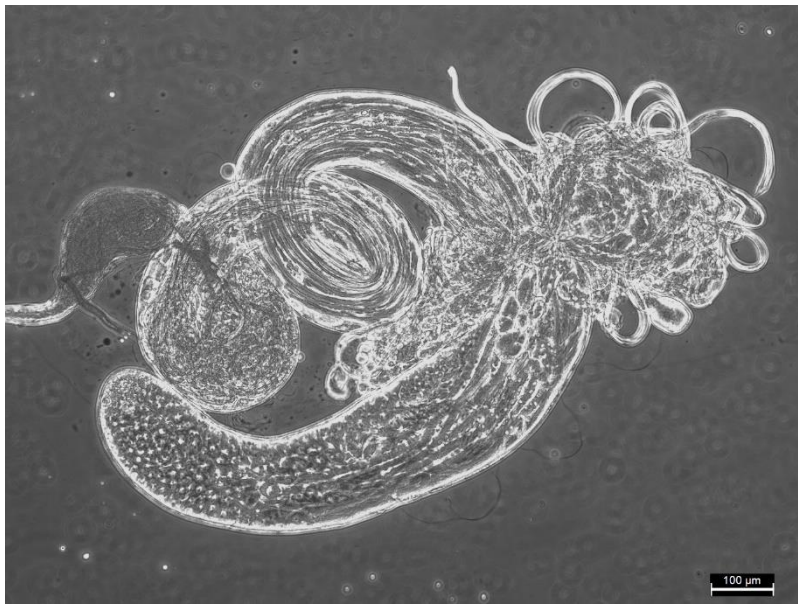

**B**

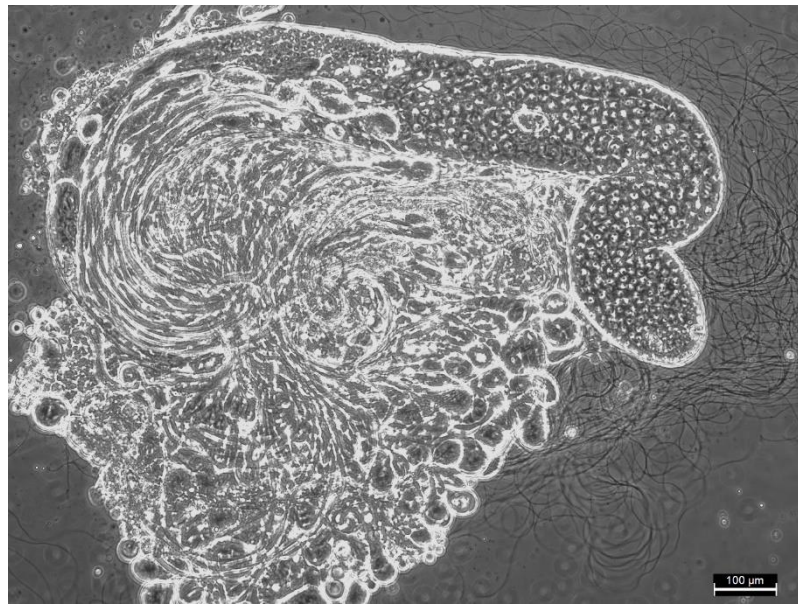

**C**

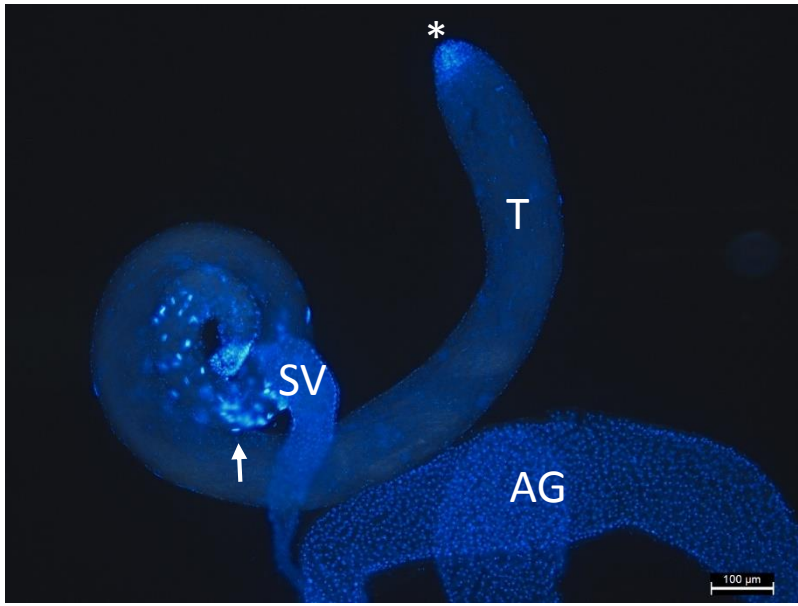

**D**

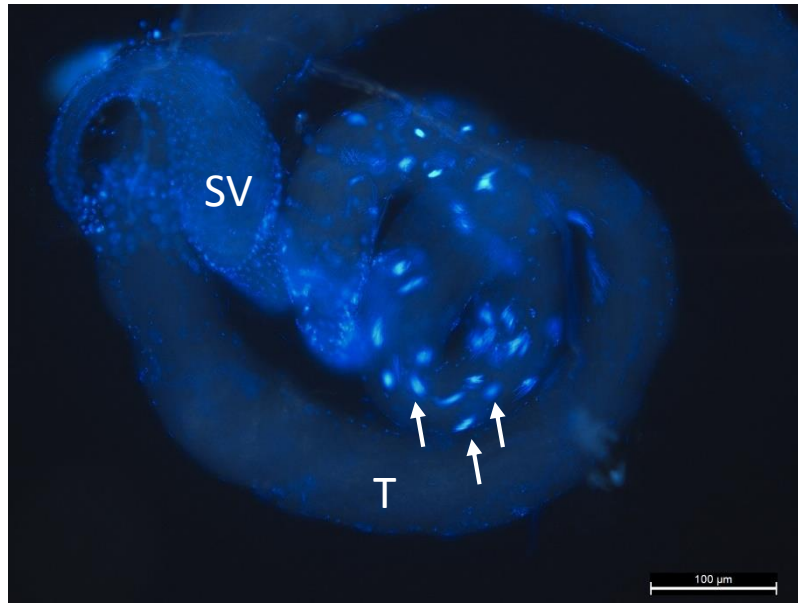

Figure S3

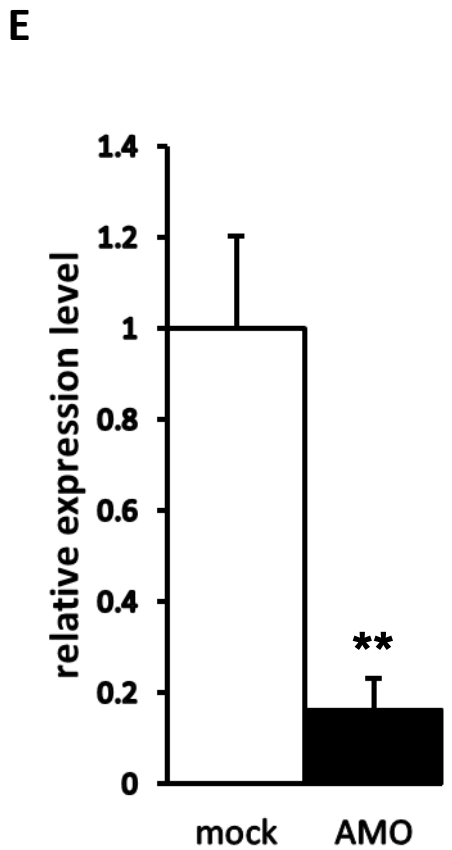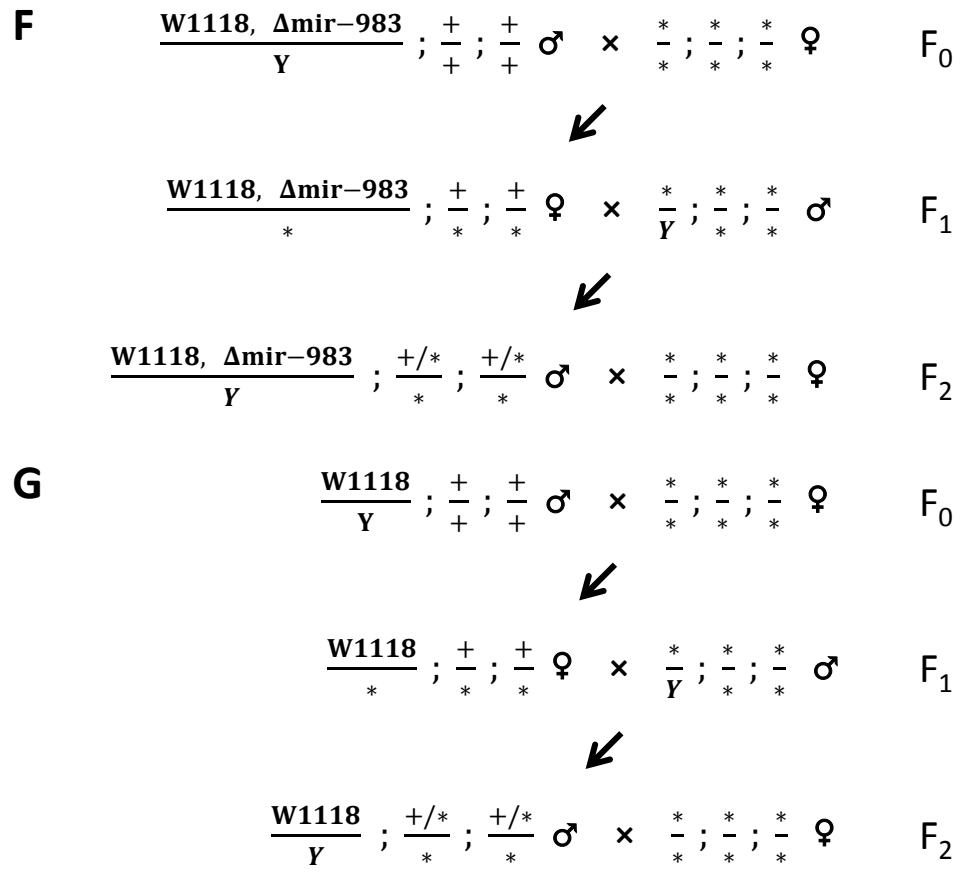

Figure S4

A

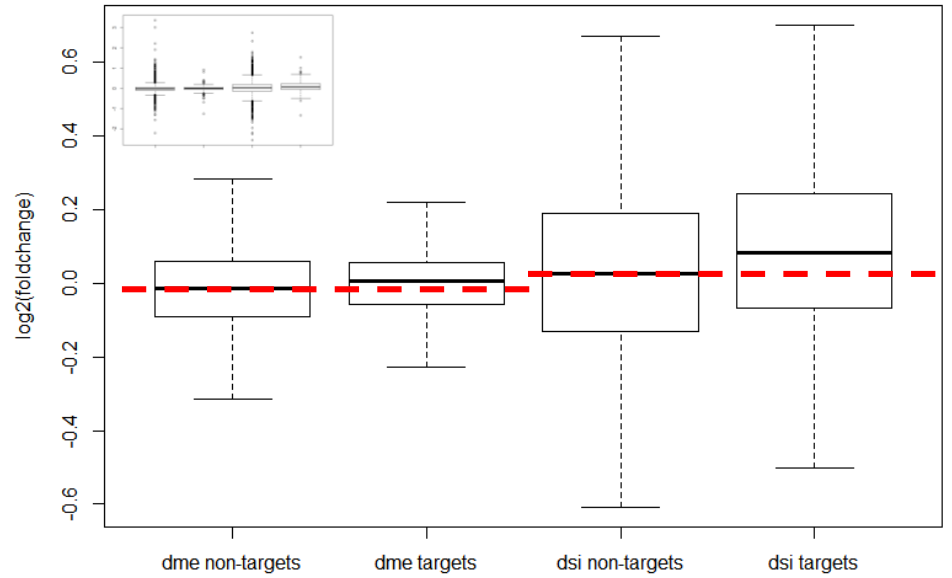

B

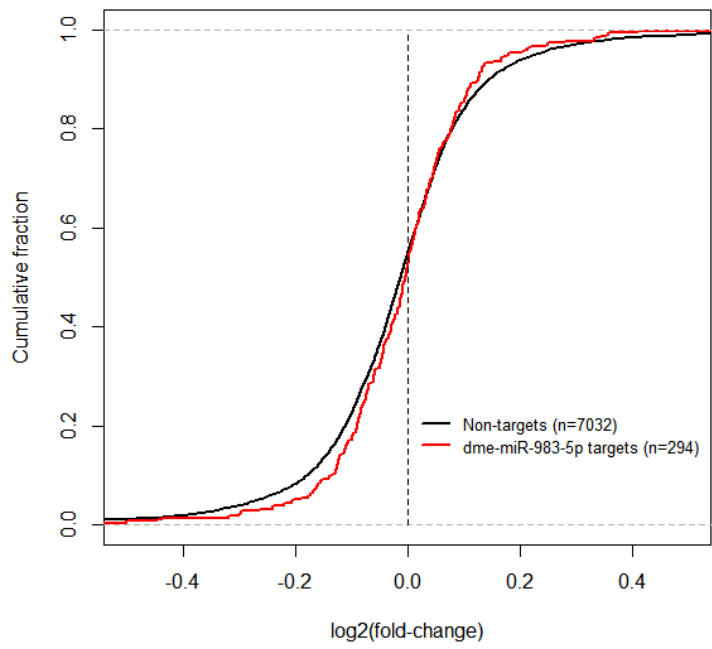

C

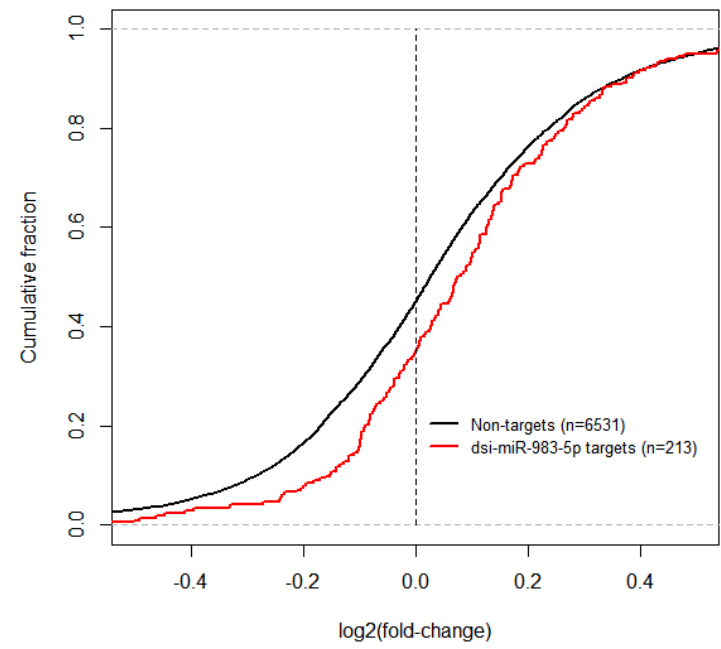

Figure S4

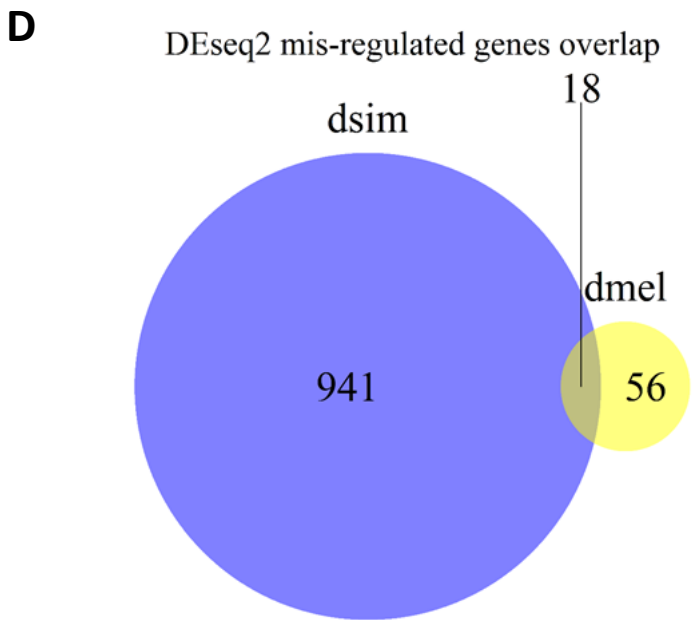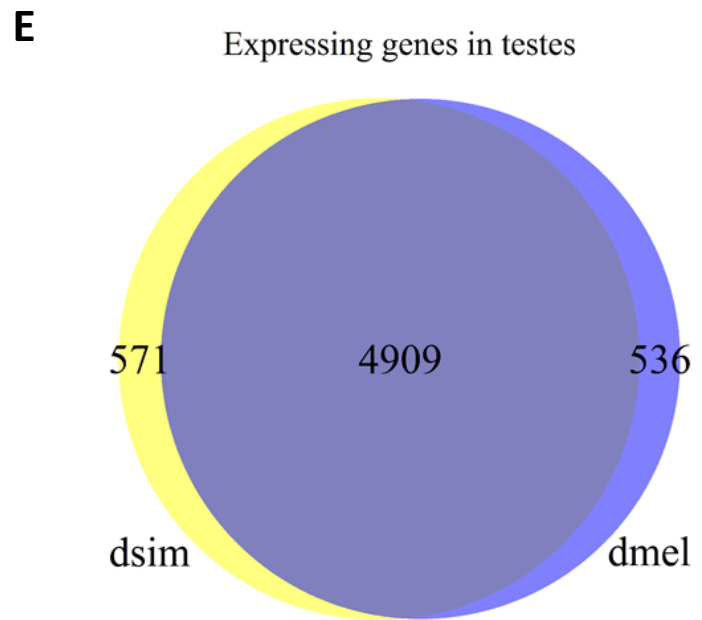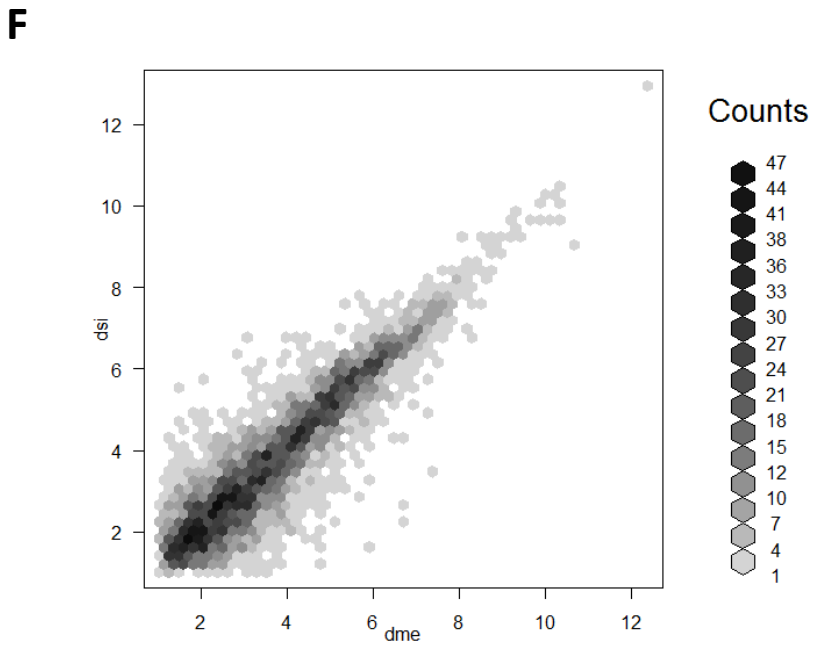

Table S1 Progeny count of control and *dsi-mir-983a* KO flies

| <i>D. simulans</i>  |         | ♂    | ♀    | P value |
|---------------------|---------|------|------|---------|
| <b>First round</b>  | Control | 1354 | 1319 | -       |
|                     | KO-1    | 240  | 271  | 0.1266  |
|                     | KO-2    | 159  | 181  | 0.1766  |
|                     | KO-3    | 176  | 149  | 0.2334  |
| <b>Second round</b> | Control | 921  | 904  | -       |
|                     | KO-1    | 398  | 358  | 0.3134  |
|                     | KO-2    | 314  | 324  | 0.5869  |
|                     | KO-3    | 239  | 227  | 0.7515  |

Table S2 Significantly mis-regulated genes in *D. melanogaster* and *D. simulans*

|                              | <i>D. melanogaster</i> |                | <i>D. simulans</i> |                |
|------------------------------|------------------------|----------------|--------------------|----------------|
|                              | Up-regulated           | Down-regulated | Up-regulated       | Down-regulated |
| <b>5p TargetScan targets</b> | 3                      | 3              | 38                 | 8              |
| <b>non-targets</b>           | 58                     | 57             | 583                | 577            |
| <b>P Value</b>               | 1                      |                | < 0.0001           |                |
| <b>5p PITA targets</b>       | 2                      | 4              | 27                 | 10             |
| <b>non-targets</b>           | 59                     | 56             | 594                | 575            |
| <b>P Value</b>               | 0.4392                 |                | 0.0112             |                |

Table S3 Mis-regulated genes are enriched in male biased genes in *D. simulans*

| <i>D. simulans</i> | misregulated genes | other genes | P value  |
|--------------------|--------------------|-------------|----------|
| male biased        | 408                | 1326        | < 0.0001 |
| female biased      | 304                | 2123        |          |



Table S4 Small RNA sequencing libraries used in this study

| <b>GEO asceesion</b> | <b>genetic background</b> | <b>tissue</b> | <b>species</b>         | <b>citations</b>       |
|----------------------|---------------------------|---------------|------------------------|------------------------|
| <b>GSM909277</b>     | Oregon R                  | Testes        | <i>D. melanogaster</i> | (Toledano et al. 2012) |
| <b>GSM909278</b>     | Oregon R                  | Testes        | <i>D. melanogaster</i> | (Toledano et al. 2012) |
| <b>GSM280085</b>     | Oregon R                  | Testes        | <i>D. melanogaster</i> | (Czech et al. 2008)    |
| <b>GSM548584</b>     | yw67c23(2)                | Testes        | <i>D. melanogaster</i> | (Rozhkov et al. 2010)  |
| <b>GSM2562978</b>    | Canton S                  | Testes        | <i>D. melanogaster</i> | -                      |
| <b>GSM2562975</b>    | Z56                       | Testes        | <i>D. melanogaster</i> | -                      |
| <b>GSM1165053</b>    | NC48S                     | Testes        | <i>D. simulans</i>     | (Lyu et al. 2014)      |
| -                    | wild-type                 | Testes        | <i>D. sechellia</i>    | this study             |
| -                    | wild-type                 | Testes        | <i>D. erecta</i>       | this study             |
| <b>GSM548610</b>     | strain 9                  | Testes        | <i>D. virilis</i>      | (Rozhkov et al. 2010)  |
| <b>GSM548623</b>     | strain 160                | Testes        | <i>D. virilis</i>      | (Rozhkov et al. 2010)  |

Table S5 TALEN binding sites for different miRNAs

| miRNA                   | TALEN binding site                                                         |
|-------------------------|----------------------------------------------------------------------------|
| <i>dme-mir-984</i>      | <u>TTATAGTTAAAAGACA</u> <i>AAATTCCAACCGT</i> <u>ATTTACCTCA</u> ATGAA       |
| <i>dme-mir-983-1/-2</i> | GAATGTTTACAACA <u>ACT</u> <i>AGATAATGCGTAACT</i> <u>ACCTAAT</u> GAATGAACTG |
| <i>dsi-mir-983a</i>     | GACTGAAAAT <u>CATGTGTT</u> <i>CGAAAGGTATTA</i> <u>CT</u> AAATTACTGCAAG     |

Mature miRNA sequences are in red, the left and right TALEN binding sites are underlined.

Table S6 Primers used for miRNAs mutant detection

| miRNA                                     | F primer                 | R primer                 | Length |
|-------------------------------------------|--------------------------|--------------------------|--------|
| <i>dme-mir-983-1/-2 &amp; dme-mir-984</i> | TGCGCCATTCAATGTCTATC     | TGAGTCGTCAACTCGGTGAG     | 566    |
| <i>dsi-mir-983a</i>                       | GCACGGTACGTTTATGTTTCTAGG | GGTAAAGAAGGGAAAGCTTTTGGG | 899    |

Table S7 *Drosophila* stocks used in this study

| <b>Species</b>         | <b>Genotype</b>                              |
|------------------------|----------------------------------------------|
| <i>D. melanogaster</i> | w[1118]                                      |
| <i>D. melanogaster</i> | Canton-S                                     |
| <i>D. melanogaster</i> | w[67c23] P{w[+mC]=lacW}Smox[G0348]/FM7c      |
| <i>D. simulans</i>     | w[501]                                       |
| <i>D. simulans</i>     | Sim6                                         |
| <i>D. erecta</i>       | wild-type (UCSD Stock Number: 14021-0224.01) |
| <i>D. sechellia</i>    | wild-type (UCSD Stock Number: 14021-0248.20) |

Table S8 Primers used for qRT-PCR

A

The reverse transcription primers

| miRNA                  | RT Primers                                                 |
|------------------------|------------------------------------------------------------|
| <i>dme-miR-983-5p</i>  | GTTGGCTCTGGTGCAGGGTCCGAGGTATTCGCACCAGAGCCAAC <b>TCATTA</b> |
| <i>dme-miR-983-3p</i>  | GTTGGCTCTGGTGCAGGGTCCGAGGTATTCGCACCAGAGCCAAC <b>AGATAA</b> |
| <i>dme-miR-984-5p</i>  | GTTGGCTCTGGTGCAGGGTCCGAGGTATTCGCACCAGAGCCAAC <b>AAATTC</b> |
| <i>dme-miR-984-3p</i>  | GTTGGCTCTGGTGCAGGGTCCGAGGTATTCGCACCAGAGCCAAC <b>CGAGCC</b> |
| <i>dsi-miR-983a-5p</i> | GTTGGCTCTGGTGCAGGGTCCGAGGTATTCGCACCAGAGCCAAC <b>TCATGT</b> |
| <i>dsi-miR-983a-3p</i> | GTTGGCTCTGGTGCAGGGTCCGAGGTATTCGCACCAGAGCCAAC <b>TAGATA</b> |
| 2s                     | GTTGGCTCTGGTGCAGGGTCCGAGGTATTCGCACCAGAGCCAAC <b>TACAAC</b> |

Green regions show the reverse complement sequence for the last 6nt of miRNA 3' end.

B

The quantitative real-time PCR primers

| miRNA                    | Primes                        |
|--------------------------|-------------------------------|
| <i>dme-miR-983-5p</i>    | GGCG <b>ATAATACGTTTCGAAC</b>  |
| <i>dme-miR-983-3p</i>    | GGCG <b>ATTAGGTAGTTACGCA</b>  |
| <i>dme-miR-984-5p</i>    | GGCG <b>TGAGGTAAATACGGTTG</b> |
| <i>dme-miR-984-3p</i>    | GGCG <b>ATCCAACCGAATT</b>     |
| <i>dsi-miR-983a-5p</i>   | GGCG <b>AGTAATACCTTCGAAC</b>  |
| <i>dsi-miR-983a-3p</i>   | GGCG <b>ATGAGTTCGTCAAGTAT</b> |
| 2s                       | GGCGTGCTTGGACTACATATGG        |
| Universal reverse primer | GTGCAGGGTCCGAGGT              |

Red regions show the mature miRNA sequences (not include the last 6nt at 3' end).

Table S9 Mapping statistics for transcriptome analysis

| Sample                               | Replicate | Left reads | Mapped   | Right reads | Mapped   | Read mapping rate |
|--------------------------------------|-----------|------------|----------|-------------|----------|-------------------|
| <i>D. melanogaster</i><br>Control    | 1         | 15701838   | 14797616 | 15701838    | 14708188 | 94.0%             |
| <i>D. melanogaster</i><br>Control    | 2         | 16648324   | 15652002 | 16648324    | 15564491 | 93.8%             |
| <i>D. melanogaster</i><br>miR-983 KO | 1         | 15457375   | 14524051 | 15457375    | 14443131 | 93.7%             |
| <i>D. melanogaster</i><br>miR-983 KO | 2         | 16141249   | 15196878 | 16141249    | 15103784 | 93.9%             |
| <i>D. simulans</i><br>Control        | 1         | 16748697   | 15183497 | 16748697    | 15096516 | 90.4%             |
| <i>D. simulans</i><br>Control        | 2         | 16220169   | 14710465 | 16220169    | 14620237 | 90.4%             |
| <i>D. simulans</i><br>miR-983 KO-1   | 1         | 17572804   | 16214515 | 17572804    | 16117784 | 92.0%             |
| <i>D. simulans</i><br>miR-983 KO-1   | 2         | 18118800   | 16680233 | 18118800    | 16587830 | 91.8%             |
